# Supplementary material
Source: PubMed Central journal article supplement (PMC6024445)
Supplement: tom-00100-16-s001.pdf [file tom-00100-16-s001.pdf]

SUPPLEMENTAL DATA

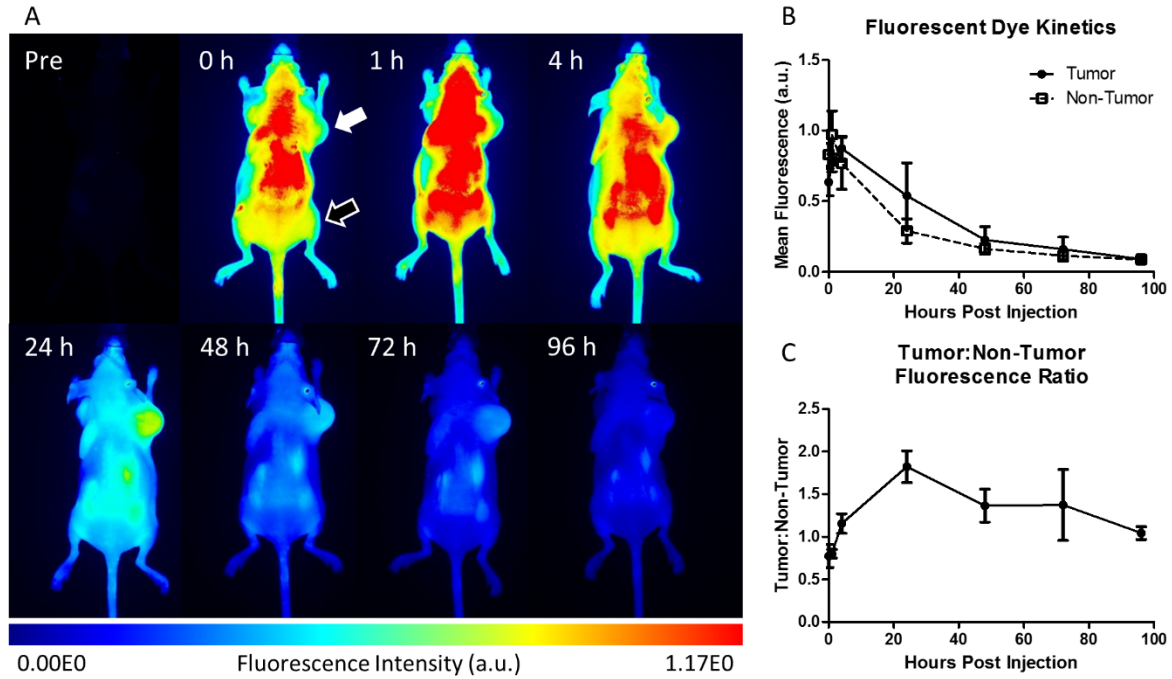

Supplemental Figure 1: A) Time course images of a HT1080 xenograft model injected with a targeted fluorescent dye, from pre-injection to 96 hours post injection. Tumor identified by the white arrow and non-tumor region identified by the outlined arrow. B) Fluorescent dye *in vivo* kinetics, with 24 hours post injection showing largest difference between tumor and non-tumor regions. C) Tumor to non-tumor ratio showing maximum contrast at 24 hours post injection.
