# Supplementary material
Source: PubMed Central journal article supplement (PMC6024445)
Supplement: tom-00100-16-s002.pdf [file tom-00100-16-s002.pdf]

SUPPLEMENTAL DATA

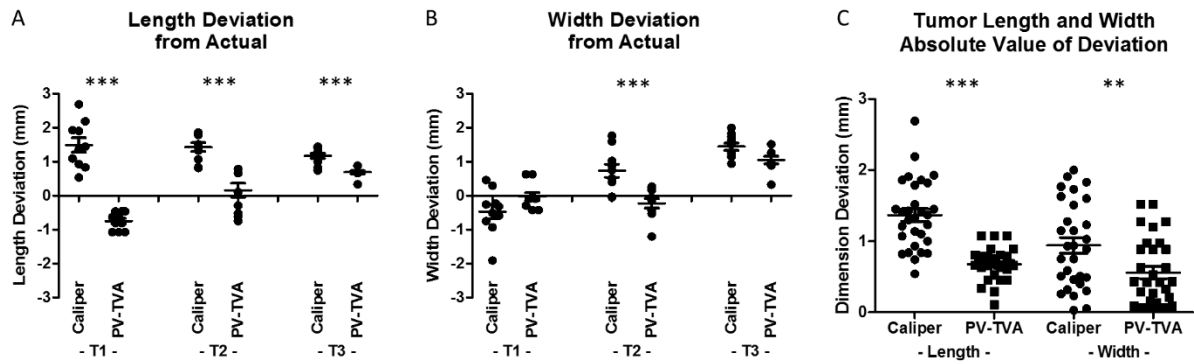

Supplemental Figure 2: A) PV-TVA Length deviations for three HT1080 tumors (T1, T2, and T3) from the *in situ* length measurement. The algorithm was run 10 times for each image. B) Width deviations from the *in situ* width measurement. C) Absolute value of the deviations of the length and width for both calculation methods to measure the accuracy.
